# Supplementary material
Source: publisher figshare collection journal article supplement (https://springernature.figshare.com/ndownloader/files/20089058)
Supplement: Supplementary file 1 [file 20089058]

## Sheet: specimens
Specimen Number	Label data	HW	HL	SL	SW	EL	FeL	WL	OcW	caste	genus	species (complex)	Group
496	RHYG A790m	1.26087	1.41304	1.21739	0.104348	0.384743	1.76087	1.69565		minor	Colobopsis	saundersi	COCY
497	RHYG A790m	1.31522	1.47826	1.28261	0.123913	0.384743	1.82609	1.82609		minor	Colobopsis	saundersi	COCY
498	RHYG A790m	1.38043	1.54348	1.30435	0.123913	0.39801	1.8587	1.8913		minor	Colobopsis	saundersi	COCY		Acronym	Measurement
499	RHYG A790m	1.32609	1.52174	1.26087	0.130435	0.391376	1.82609	1.8913		minor	Colobopsis	saundersi	COCY		HW	head width, including eyes
500	RHYG KB02-118	1.43478	1.56522	1.29348	0.130435	0.39801	1.8587	2.08696		minor	Colobopsis	saundersi	COCY		HL	head length
501	RHYG KB02-118	1.36957	1.56522	1.26087	0.123913	0.411277	1.92391	1.95652		minor	Colobopsis	saundersi	COCY		SL	scape length
502	RHYG KB02-118	1.30435	1.45652	1.21739	0.119565	0.384743	1.76087	1.8587		minor	Colobopsis	saundersi	COCY		SW	scape width
503	RHYG KB02-118	1.29348	1.43478	1.26087	0.113043	0.364842	1.8587	1.95652		minor	Colobopsis	saundersi	COCY		EL	eye length
504	RHYG KB02-118	1.32609	1.47826	1.22826	0.108696	0.384743	1.76087	1.82609		minor	Colobopsis	saundersi	COCY		WL	mesosoma length (Weber's length)
505	RHYG KB02-118	1.32609	1.5	1.26087	0.130435	0.39801	1.80978	1.8913		minor	Colobopsis	saundersi	COCY		FeL	femur length
506	RHYG KB02-118	1.32609	1.5	1.26087	0.130435	0.384743	1.82609	1.95652		minor	Colobopsis	saundersi	COCY		OcW	median ocellus width
507	RHYG KB02-118	1.30435	1.45652	1.21739	0.123913	0.344942	1.79348	1.8913		minor	Colobopsis	saundersi	COCY
508	RHYG KB02-118	1.23913	1.3587	1.23913	0.123913	0.358209	1.77717	1.82609		minor	Colobopsis	saundersi	COCY
509	RHYG KB02-118	1.21739	1.34783	1.17391	0.104348	0.39801	1.72826	1.82609		minor	Colobopsis	saundersi	COCY
640	YG 2025	1.23913	1.3913	1.27174	0.123913	0.351575	1.8587	1.63043		minor	Colobopsis	saundersi	COCY
641	YG 2025	1.41304	1.63043	1.34783	0.130435	0.384743	1.95652	1.8913		minor	Colobopsis	saundersi	COCY
642	YG 2025	1.34783	1.5	1.30435	0.130435	0.384743	1.8913	1.82609		minor	Colobopsis	saundersi	COCY
643	YG 2025	1.36957	1.47826	1.28261	0.130435	0.364842	1.92391	1.76087		minor	Colobopsis	saundersi	COCY
858	YG T-trail (202)	1.34783	1.52174	1.26087	0.130435	0.364842	1.92391	1.82609		minor	Colobopsis	saundersi	COCY
859	YG T-trail (202)	1.54348	1.73913	1.3913	0.15	0.431177	2.08696	2.21739		minor	Colobopsis	saundersi	COCY
860	YG T-trail (202)	1.28261	1.43478	1.26087	0.119565	0.364842	1.82609	1.79348		minor	Colobopsis	saundersi	COCY
861	YG T-trail (202)	1.30435	1.45652	1.29348	0.123913	0.378109	1.92391	1.76087		minor	Colobopsis	saundersi	COCY
862	YG T-trail (202)	1.44565	1.63043	1.34783	0.136957	0.411277	2.02174	1.95652		minor	Colobopsis	saundersi	COCY
630	YG KB02-108	1.22826	1.3913	1.23913	0.130435	0.338308	1.76087	1.53125		minor	Colobopsis	saundersi	COCY
631	YG KB02-108	1.28261	1.43478	1.27174	0.123913	0.344942	1.82609	1.59375		minor	Colobopsis	saundersi	COCY
632	YG KB02-108	1.28261	1.43478	1.28261	0.123913	0.364842	1.875	1.6875		minor	Colobopsis	saundersi	COCY
633	YG KB02-108	1.29348	1.41304	1.32609	0.123913	0.351575	1.80978	1.59375		minor	Colobopsis	saundersi	COCY
634	YG KB02-108	1.28261	1.38043	1.23913	0.123913	0.351575	1.76087	1.5625		minor	Colobopsis	saundersi	COCY
635	YG KB02-108	1.22826	1.30435	1.26087	0.113043	0.358209	1.72826	1.5625		minor	Colobopsis	saundersi	COCY
636	YG KB02-108	1.26087	1.38043	1.28261	0.123913	0.358209	1.77717	1.5		minor	Colobopsis	saundersi	COCY
637	YG KB02-108	1.23913	1.3913	1.28261	0.123913	0.358209	1.79348	1.65625		minor	Colobopsis	saundersi	COCY
867	YG-2 (73)	1.42391	1.6087	1.32609	0.136957	0.384743	2.02174	2.02174		minor	Colobopsis	saundersi	COCY
868	YG-2 (73)	1.41304	1.6087	1.34783	0.136957	0.39801	1.95652	2.02174		minor	Colobopsis	saundersi	COCY
869	YG-2 (73)	1.53261	1.76087	1.3913	0.143478	0.41791	2.02174	1.8913		minor	Colobopsis	saundersi	COCY
870	YG-2 (73)	1.36957	1.6087	1.34783	0.130435	0.391376	1.98913	2.08696		minor	Colobopsis	saundersi	COCY
871	YG-2 (73)	1.47826	1.69565	1.3913	0.130435	0.411277	1.98913	2.08696		minor	Colobopsis	saundersi	COCY
872	YG-2 (49)	1.45652	1.69565	1.34783	0.143478	0.404643	1.98913	2.08696		minor	Colobopsis	saundersi	COCY
873	YG-2 (49)	1.46739	1.69565	1.34783	0.15	0.39801	1.97283	2.08696		minor	Colobopsis	saundersi	COCY
874	YG-2 (49)	1.3913	1.58696	1.36957	0.143478	0.391376	1.92391	1.92391		minor	Colobopsis	saundersi	COCY
875	YG-2 (49)	1.42391	1.58696	1.32609	0.136957	0.378109	1.95652	1.95652		minor	Colobopsis	saundersi	COCY
876	YG-2 (49)	1.36957	1.52174	1.31522	0.136957	0.378109	1.97283	1.8913		minor	Colobopsis	saundersi	COCY
877	YG-2 (49)	1.3913	1.56522	1.32609	0.130435	0.39801	1.92391	1.95652		minor	Colobopsis	saundersi	COCY
878	YG-2 (49)	1.5	1.72826	1.32609	0.163043	0.424544	1.98913	2.15217		minor	Colobopsis	saundersi	COCY
1557	YG KBFSC (Vienna colony)	1.43478	1.6087	1.29348	0.143478	0.391376	1.95652	1.95652		minor	Colobopsis	saundersi	COCY
1558	YG KBFSC (Vienna colony)	1.46739	1.67391	1.29348	0.143478	0.39801	2.02174	2.08696		minor	Colobopsis	saundersi	COCY
1559	YG KBFSC (Vienna colony)	1.52174	1.71739	1.32609	0.15	0.41791	2.08696	2.11957		minor	Colobopsis	saundersi	COCY
1560	YG KBFSC (Vienna colony)	1.56522	1.78261	1.36957	0.152174	0.41791	2.10326	2.21739		minor	Colobopsis	saundersi	COCY
1561	YG KBFSC (Vienna colony)	1.41304	1.58696	1.27174	0.143478	0.391376	1.95652	1.98913		minor	Colobopsis	saundersi	COCY
1562	YG KBFSC (Vienna colony)	1.41304	1.63043	1.27174	0.143478	0.404643	1.95652	1.98913		minor	Colobopsis	saundersi	COCY
1563	YG KBFSC (Vienna colony)	1.28261	1.47826	1.26087	0.130435	0.371476	1.82609	1.76087		minor	Colobopsis	saundersi	COCY
1564	YG KBFSC (Vienna colony)	1.26087	1.43478	1.23913	0.130435	0.351575	1.79348	1.69565		minor	Colobopsis	saundersi	COCY
1565	YG KBFSC (Vienna colony)	1.47826	1.67391	1.32609	0.143478	0.424544	2.05435	2.05435		minor	Colobopsis	saundersi	COCY
1566	YG KBFSC (Vienna colony)	1.30435	1.5	1.23913	0.130435	0.378109	1.8587	1.82609		minor	Colobopsis	saundersi	COCY
1567	YG KBFSC (Vienna colony)	1.36957	1.52174	1.28261	0.136957	0.384743	1.875	1.82609		minor	Colobopsis	saundersi	COCY
1568	YG KBFSC (Vienna colony)	1.40217	1.56522	1.26087	0.141304	0.378109	1.92391	1.95652		minor	Colobopsis	saundersi	COCY
1569	YG KBFSC (Vienna colony)	1.34783	1.5	1.23913	0.136957	0.391376	1.8587	1.82609		minor	Colobopsis	saundersi	COCY
1570	YG KBFSC (Vienna colony)	1.29348	1.47826	1.26087	0.123913	0.364842	1.875	1.8913		minor	Colobopsis	saundersi	COCY
1571	YG KBFSC (Vienna colony)	1.45652	1.6087	1.30435	0.143478	0.39801	1.98913	2.02174		minor	Colobopsis	saundersi	COCY
1572	YG KBFSC (Vienna colony)	1.32609	1.5	1.26087	0.136957	0.378109	1.8913	1.82609		minor	Colobopsis	saundersi	COCY
1573	YG KBFSC (Vienna colony)	1.43478	1.65217	1.28261	0.136957	0.391376	1.97283	1.98913		minor	Colobopsis	saundersi	COCY
1574	YG KBFSC (Vienna colony)	1.41304	1.58696	1.28261	0.136957	0.391376	1.95652	1.8913		minor	Colobopsis	saundersi	COCY
1575	YG KBFSC (Vienna colony)	1.21739	1.34783	1.20652	0.123913	0.358209	1.84239	1.69565		minor	Colobopsis	saundersi	COCY
1576	YG KBFSC (Vienna colony)	1.38043	1.58696	1.27174	0.143478	0.384743	1.94022	1.92391		minor	Colobopsis	saundersi	COCY
1758	KBFSC 2017, cf YG 2a	1.42391	1.58696	1.36957	0.15	0.404643	2.05435	2.02174		minor	Colobopsis	saundersi	COCY
1759	KBFSC 2017, cf YG 2a	1.54348	1.80435	1.3913	0.156522	0.431177	2.15217	2.21739		minor	Colobopsis	saundersi	COCY
1760	KBFSC 2017, cf YG 2a	1.56522	1.82609	1.40217	0.169565	0.444444	2.18478	2.21739		minor	Colobopsis	saundersi	COCY
1762	KBFSC 2017, cf YG 2b	1.41304	1.63043	1.33696	0.136957	0.404643	2.02174	2.08696		minor	Colobopsis	saundersi	COCY
1763	KBFSC 2017, cf YG 2b	1.51087	1.75	1.33696	0.15	0.424544	2.02174	2.18478		minor	Colobopsis	saundersi	COCY
1764	KBFSC 2017, cf YG 2b	1.44565	1.65217	1.34783	0.136957	0.411277	2.02174	2.02174		minor	Colobopsis	saundersi	COCY
831	nrLCY KB02-72 (RHYG)	1.52174	1.63043	1.19565	0.123913	0.41791	1.69565	2.02174		minor	Colobopsis	saundersi	COCY
832	nrLCY KB02-72 (RHYG)	1.19565	1.34783	1.07609	0.11087	0.338308	1.5	1.63043		minor	Colobopsis	saundersi	COCY
833	nrLCY KB02-72 (RHYG)	1.38043	1.5	1.08696	0.123913	0.384743	1.53261	1.69565		minor	Colobopsis	saundersi	COCY
1102	nrSA 27 (362)	1.52174	1.72826	1.47826	0.143478	0.404643	2.15217	2.15217		minor	Colobopsis	saundersi	COCY
1103	nrSA 27 (362)	1.53261	1.73913	1.45652	0.143478	0.404643	2.16848	2.11957		minor	Colobopsis	saundersi	COCY
1104	nrSA 27 (362)	1.45652	1.69565	1.41304	0.141304	0.39801	2.11957	2.02174		minor	Colobopsis	saundersi	COCY
1105	nrSA 27 (362)	1.3913	1.58696	1.36957	0.136957	0.391376	2.05435	1.98913		minor	Colobopsis	saundersi	COCY
1106	nrSA 27 (362)	1.41304	1.54348	1.3913	0.136957	0.371476	2.08696	1.95652		minor	Colobopsis	saundersi	COCY
1162	nrSA 27 (362)	1.51087	1.69565	1.45652	0.143478	0.404643	2.20109	2.08696		minor	Colobopsis	saundersi	COCY
1163	nrSA 27 (362)	1.58696	1.80435	1.47826	0.15	0.431177	2.21739	2.15217		minor	Colobopsis	saundersi	COCY
1164	nrSA 27 (362)	1.45652	1.65217	1.41304	0.143478	0.391376	2.16848	1.95652		minor	Colobopsis	saundersi	COCY
1165	nrSA 27 (362)	1.45652	1.63043	1.41304	0.136957	0.39801	2.15217	1.95652		minor	Colobopsis	saundersi	COCY
1166	nrSA 27 (362)	1.53261	1.76087	1.46739	0.15	0.404643	2.21739	2.11957		minor	Colobopsis	saundersi	COCY
1167	nrSA 27 (362)	1.54348	1.76087	1.43478	0.143478	0.424544	2.25	2.08696		minor	Colobopsis	saundersi	COCY
1168	nrSA 27 (362)	1.48913	1.70652	1.43478	0.136957	0.424544	2.15217	2.08696		minor	Colobopsis	saundersi	COCY
1169	nrSA 27 (362)	1.45652	1.58696	1.41304	0.130435	0.39801	2.11957	2.02174		minor	Colobopsis	saundersi	COCY
1170	nrSA 27 (362)	1.44565	1.6087	1.42391	0.136957	0.391376	2.15217	1.98913		minor	Colobopsis	saundersi	COCY
1171	nrSA 27 (362)	1.45652	1.63043	1.43478	0.143478	0.391376	2.15217	1.95652		minor	Colobopsis	saundersi	COCY
1172	nrSA 27 (362)	1.45652	1.69565	1.44565	0.143478	0.391376	2.16848	2.02174		minor	Colobopsis	saundersi	COCY
1386	nrSA 27 minor	1.45652	1.65217	1.41304	0.130435	0.391376	2.16848	1.95652		minor	Colobopsis	saundersi	COCY
1387	nrSA 27 minor	1.36957	1.59783	1.3913	0.130435	0.391376	2.11957	1.95652		minor	Colobopsis	saundersi	COCY
1388	nrSA 27 minor	1.41304	1.56522	1.3913	0.136957	0.38806	2.11957	1.8913		minor	Colobopsis	saundersi	COCY
1389	nrSA 27 minor	1.44565	1.66304	1.42391	0.141304	0.391376	2.18478	2.05435		minor	Colobopsis	saundersi	COCY
1390	nrSA 27 minor	1.41304	1.61957	1.3913	0.136957	0.39801	2.13587	1.95652		minor	Colobopsis	saundersi	COCY
1391	nrSA 27 minor	1.43478	1.56522	1.41304	0.136957	0.391376	2.10326	1.95652		minor	Colobopsis	saundersi	COCY
1392	nrSA 27 minor	1.52174	1.71739	1.41304	0.143478	0.404643	2.25	2.08696		minor	Colobopsis	saundersi	COCY
1393	nrSA 27 minor	1.5	1.67391	1.45652	0.143478	0.411277	2.08696	2.02174		minor	Colobopsis	saundersi	COCY
1394	nrSA 27 minor	1.52174	1.73913	1.43478	0.15	0.41791	2.21739	2.08696		minor	Colobopsis	saundersi	COCY
1395	nrSA 27 minor	1.6087	1.84783	1.45652	0.15	0.431177	2.28261	2.28261		minor	Colobopsis	saundersi	COCY
1396	nrSA 27 minor	1.65217	1.82609	1.51087	0.152174	0.431177	2.25	2.21739		minor	Colobopsis	saundersi	COCY
1397	nrSA 27 minor	1.6087	1.78261	1.5	0.156522	0.431177	2.31522	2.15217		minor	Colobopsis	saundersi	COCY
1398	nrSA 27 minor	1.61957	1.84783	1.5	0.15	0.424544	2.33152	2.21739		minor	Colobopsis	saundersi	COCY
1399	nrSA 27 minor	1.5	1.69565	1.41304	0.15	0.391376	2.20109	2.02174		minor	Colobopsis	saundersi	COCY
1400	nrSA 27 minor	1.56522	1.76087	1.48913	0.15	0.41791	2.25	2.11957		minor	Colobopsis	saundersi	COCY
1401	nrSA 27 minor	1.57609	1.73913	1.47826	0.152174	0.437811	2.25	2.15217		minor	Colobopsis	saundersi	COCY
1402	nrSA 27 minor	1.58696	1.75	1.46739	0.15	0.41791	2.28261	2.21739		minor	Colobopsis	saundersi	COCY
1403	nrSA 27 minor	1.56522	1.75	1.47826	0.143478	0.424544	2.21739	2.15217		minor	Colobopsis	saundersi	COCY
1404	nrSA 27 minor	1.6087	1.86957	1.47826	0.152174	0.431177	2.31522	2.21739		minor	Colobopsis	saundersi	COCY
1405	nrSA 27 minor	1.66304	1.92391	1.52174	0.156522	0.444444	2.31522	2.21739		minor	Colobopsis	saundersi	COCY
1406	nrSA 27 minor	1.67391	1.86957	1.51087	0.156522	0.437811	2.28261	2.25		minor	Colobopsis	saundersi	COCY
1407	nrSA 27 minor	1.52174	1.71739	1.46739	0.143478	0.39801	2.21739	2.08696		minor	Colobopsis	saundersi	COCY
1408	nrSA 27 minor	1.67391	1.93478	1.52174	0.152174	0.444444	2.28261	2.34783		minor	Colobopsis	saundersi	COCY
1409	nrSA 27 minor	1.58696	1.78261	1.47826	0.15	0.431177	2.2337	2.21739		minor	Colobopsis	saundersi	COCY
1410	nrSA 27 minor	1.52174	1.71739	1.42391	0.143478	0.39801	2.18478	2.08696		minor	Colobopsis	saundersi	COCY
1411	nrSA 27 minor	1.54348	1.72826	1.45652	0.143478	0.411277	2.21739	2.11957		minor	Colobopsis	saundersi	COCY
1684	CASA? ("G" #29) KBFSC 2017	1.41304	1.54348	1.36957	0.130435	0.39801	2.08696	1.95652		minor	Colobopsis	saundersi	COCY
1685	CASA? ("G" #29) KBFSC 2017	1.43478	1.54348	1.36957	0.130435	0.404643	2.07065	1.95652		minor	Colobopsis	saundersi	COCY
1686	CASA? ("G" #29) KBFSC 2017	1.45652	1.63043	1.34783	0.136957	0.404643	2.05435	1.95652		minor	Colobopsis	saundersi	COCY
1687	CASA? ("G" #29) KBFSC 2017	1.52174	1.67391	1.36957	0.141304	0.41791	2.05435	2.15217		minor	Colobopsis	saundersi	COCY
1688	CASA? ("G" #29) KBFSC 2017	1.43478	1.58696	1.41304	0.130435	0.391376	2.08696	1.95652		minor	Colobopsis	saundersi	COCY
1689	CASA? ("G" #29) KBFSC 2017	1.41304	1.52174	1.34783	0.130435	0.39801	2.02174	1.95652		minor	Colobopsis	saundersi	COCY
1690	RHOG ("B" 27 ) KBFSC 2017	1.30435	1.47826	1.13043	0.130435	0.384743	1.56522	1.82609		minor	Colobopsis	saundersi	COCY
1691	RHOG ("B" 27 ) KBFSC 2017	1.21739	1.36957	1.13043	0.119565	0.364842	1.54891	1.69565		minor	Colobopsis	saundersi	COCY
1692	RHOG ("B" 27 ) KBFSC 2017	1.32609	1.52174	1.15217	0.136957	0.39801	1.61413	1.8587		minor	Colobopsis	saundersi	COCY
1693	RHOG ("B" 27 ) KBFSC 2017	1.18478	1.34783	1.09783	0.117391	0.358209	1.53261	1.66304		minor	Colobopsis	saundersi	COCY
1694	RHOG ("B" 27 ) KBFSC 2017	1.19565	1.32609	1.09783	0.123913	0.364842	1.53261	1.72826		minor	Colobopsis	saundersi	COCY
1695	RHOG ("B" 27 ) KBFSC 2017	1.34783	1.52174	1.1413	0.130435	0.404643	1.61413	1.95652		minor	Colobopsis	saundersi	COCY
1696	RHOG ("B" 27 ) KBFSC 2017	1.38043	1.58696	1.19565	0.136957	0.411277	1.69565	2.02174		minor	Colobopsis	saundersi	COCY
1697	RHYG? ("E" 26) KBFSC 2017	1.32609	1.52174	1.20652	0.136957	0.411277	1.76087	1.8913		minor	Colobopsis	saundersi	COCY
1698	RHYG? ("E" 26) KBFSC 2017	1.30435	1.51087	1.19565	0.130435	0.404643	1.79348	1.82609		minor	Colobopsis	saundersi	COCY
1699	RHYG? ("E" 26) KBFSC 2017	1.34783	1.56522	1.22826	0.136957	0.411277	1.8587	1.95652		minor	Colobopsis	saundersi	COCY
1700	RHYG? ("E" 26) KBFSC 2017	1.34783	1.54348	1.25	0.136957	0.414594	1.84239	1.98913		minor	Colobopsis	saundersi	COCY
1701	RHYG? ("E" 26) KBFSC 2017	1.26087	1.47826	1.18478	0.130435	0.39801	1.74457	1.76087		minor	Colobopsis	saundersi	COCY
1702	RHYG? ("E" 26) KBFSC 2017	1.36957	1.58696	1.21739	0.141304	0.427861	1.82609	2.02174		minor	Colobopsis	saundersi	COCY
1733	AR ("D") KBFSC 2017	1.3913	1.57609	1.45652	0.130435	0.384743	2.28261	2.08696		minor	Colobopsis	saundersi	COCY
1734	AR ("D") KBFSC 2017	1.41304	1.58696	1.48913	0.136957	0.364842	2.25	2.08696		minor	Colobopsis	saundersi	COCY
1735	AR ("D") KBFSC 2017	1.6087	1.79348	1.54348	0.143478	0.431177	2.41304	2.28261		minor	Colobopsis	saundersi	COCY
1736	AR ("D") KBFSC 2017	1.48913	1.63043	1.43478	0.136957	0.391376	2.2663	2.15217		minor	Colobopsis	saundersi	COCY
1737	AR ("D") KBFSC 2017	1.51087	1.66304	1.51087	0.141304	0.411277	2.31522	2.18478		minor	Colobopsis	saundersi	COCY
1738	AR? ("F") KBFSC 2017	1.57609	1.70652	1.5	0.143478	0.424544	2.31522	2.15217		minor	Colobopsis	saundersi	COCY
1739	AR? ("F") KBFSC 2017	1.79348	1.93478	1.57609	0.169565	0.464345	2.38043	2.47826		minor	Colobopsis	saundersi	COCY
1740	AR? ("F") KBFSC 2017	1.5	1.63043	1.47826	0.143478	0.39801	2.21739	2.08696		minor	Colobopsis	saundersi	COCY
1741	AR? ("F") KBFSC 2017	1.43478	1.59783	1.45652	0.143478	0.39801	2.21739	2.05435		minor	Colobopsis	saundersi	COCY
1742	AR? ("F") KBFSC 2017	1.63043	1.76087	1.54348	0.156522	0.437811	2.38043	2.21739		minor	Colobopsis	saundersi	COCY
1743	AR? ("F") KBFSC 2017	1.63043	1.76087	1.51087	0.156522	0.424544	2.34783	2.28261		minor	Colobopsis	saundersi	COCY
1744	AR? ("H") KBFSC 2017	1.63043	1.76087	1.54348	0.15	0.437811	2.31522	2.21739		minor	Colobopsis	saundersi	COCY
1745	AR? ("H") KBFSC 2017	1.61957	1.76087	1.53261	0.15	0.424544	2.31522	2.28261		minor	Colobopsis	saundersi	COCY
1746	AR? ("H") KBFSC 2017	1.6087	1.73913	1.53261	0.15	0.424544	2.28261	2.21739		minor	Colobopsis	saundersi	COCY
1747	AR? ("H") KBFSC 2017	1.67391	1.76087	1.52174	0.15	0.437811	2.38043	2.34783		minor	Colobopsis	saundersi	COCY
1748	AR? ("H") KBFSC 2017	1.69565	1.86957	1.54348	0.156522	0.444444	2.36413	2.41304		minor	Colobopsis	saundersi	COCY
1749	AR? ("H") KBFSC 2017	1.6087	1.69565	1.53261	0.15	0.437811	2.38043	2.21739		minor	Colobopsis	saundersi	COCY
1469	BBQ? A400 KBFSC	2.03261	2.25	1.5	0.195652	0.53068	2.39674	2.6087		minor	Colobopsis	leonardi	COCY
1470	BBQ? A400 KBFSC	1.81522	1.97826	1.44565	0.182609	0.470978	2.18478	2.41304		minor	Colobopsis	leonardi	COCY
1471	BBQ? A400 KBFSC	1.93478	2.13043	1.47826	0.182609	0.517413	2.2663	2.47826		minor	Colobopsis	leonardi	COCY
1472	BBQ? A400 KBFSC	1.80435	1.97826	1.3913	0.176087	0.490879	2.11957	2.28261		minor	Colobopsis	leonardi	COCY
1473	BBQ? A400 KBFSC	1.67391	1.73913	1.36957	0.163043	0.451078	2.08696	2.02174		minor	Colobopsis	leonardi	COCY
1474	BBQ? A400 KBFSC	1.3913	1.5	1.23913	0.136957	0.384743	1.82609	1.82609		minor	Colobopsis	leonardi	COCY
1475	BBQ? A400 KBFSC	1.41304	1.52174	1.23913	0.136957	0.391376	1.82609	1.76087		minor	Colobopsis	leonardi	COCY
1476	BBQ? A400 KBFSC	1.43478	1.56522	1.29348	0.143478	0.41791	1.8913	1.8913		minor	Colobopsis	leonardi	COCY
1752	BBQ Vienna 2017 med	2.06522	2.44565	1.55435	0.202174	0.543947	2.41304	2.67391		minor	Colobopsis	leonardi	COCY
1754	BBQ (25) KBFSC 2017	1.75	1.84783	1.41304	0.143478	0.477612	2.15217	2.34783		minor	Colobopsis	leonardi	COCY
1703	BBQ? ("A") KBFSC 2017	1.97826	2.31522	1.5	0.18913	0.53068	2.34783	2.67391		minor	Colobopsis	leonardi	COCY
1704	BBQ? ("A") KBFSC 2017	2	2.34783	1.54348	0.18913	0.517413	2.36413	2.73913		minor	Colobopsis	leonardi	COCY
1705	BBQ? ("A") KBFSC 2017	1.76087	1.8913	1.43478	0.169565	0.477612	2.21739	2.41304		minor	Colobopsis	leonardi	COCY
1706	BBQ? ("A") KBFSC 2017	1.6413	1.78261	1.34783	0.163043	0.437811	2.11957	2.21739		minor	Colobopsis	leonardi	COCY
1707	BBQ? ("A") KBFSC 2017	1.48913	1.58696	1.30435	0.143478	0.39801	1.95652	1.95652		minor	Colobopsis	leonardi	COCY
1709	BBQ (25) KBFSC 2017	1.82609	2	1.46739	0.169565	0.497512	2.21739	2.54348		minor	Colobopsis	leonardi	COCY
1710	BBQ (25) KBFSC 2017	1.78261	1.8913	1.45652	0.163043	0.484245	2.21739	2.41304		minor	Colobopsis	leonardi	COCY
1711	BBQ (25) KBFSC 2017	2.08696	2.31522	1.54348	0.195652	0.563847	2.44565	2.86957		minor	Colobopsis	leonardi	COCY
1712	BBQ (25) KBFSC 2017	1.78261	1.8913	1.45652	0.163043	0.510779	2.21739	2.41304		minor	Colobopsis	leonardi	COCY
1713	BBQ (25) KBFSC 2017	1.69565	1.77174	1.3913	0.156522	0.457711	2.18478	2.28261		minor	Colobopsis	leonardi	COCY
1714	BBQ ("C") KBFSC 2017	1.76087	1.91304	1.43478	0.169565	0.490879	2.28261	2.41304		minor	Colobopsis	leonardi	COCY
1715	BBQ ("C") KBFSC 2017	1.42391	1.58696	1.26087	0.136957	0.504146	1.92391	1.92391		minor	Colobopsis	leonardi	COCY
1716	BBQ ("C") KBFSC 2017	1.67391	1.84783	1.41304	0.163043	0.464345	2.21739	2.28261		minor	Colobopsis	leonardi	COCY
1717	BBQ ("C") KBFSC 2017	1.43478	1.6087	1.28261	0.141304	0.41791	1.98913	1.98913		minor	Colobopsis	leonardi	COCY
1718	BBQ ("C") KBFSC 2017	1.52174	1.6413	1.33696	0.15	0.424544	1.98913	2.02174		minor	Colobopsis	leonardi	COCY
1719	BBQ ("C") KBFSC 2017	1.56522	1.69565	1.34783	0.15	0.444444	1.98913	2.08696		minor	Colobopsis	leonardi	COCY
1720	BBQ Vienna 2017	2.01087	2.38043	1.52174	0.195652	0.517413	2.38043	2.73913		minor	Colobopsis	leonardi	COCY
1721	BBQ Vienna 2017	2.02174	2.41304	1.52174	0.195652	0.53068	2.38043	2.70652		minor	Colobopsis	leonardi	COCY
1722	BBQ Vienna 2017	1.95652	2.34783	1.46739	0.18913	0.524046	2.28261	2.47826		minor	Colobopsis	leonardi	COCY
593	AB KB02-100	1.71739	1.84783	1.56522	0.163043	0.457711	2.29891	2.28261		minor	Colobopsis	leonardi	COCY
594	AB KB02-100	1.78261	1.94565	1.58696	0.169565	0.464345	2.41304	2.41304		minor	Colobopsis	leonardi	COCY
595	AB KB02-100	1.59783	1.73913	1.54348	0.143478	0.39801	2.21739	2.21739		minor	Colobopsis	leonardi	COCY
596	AB KB02-100	2.28261	2.54348	1.76087	0.195652	0.597015	2.67391	2.93478		minor	Colobopsis	leonardi	COCY
597	AB KB02-100	1.71739	1.97826	1.58696	0.163043	0.484245	2.41304	2.41304		minor	Colobopsis	leonardi	COCY
598	AB KB02-100	2.15217	2.31522	1.78261	0.208696	0.583748	2.70652	2.80435		minor	Colobopsis	leonardi	COCY
769	AB 02-100	1.8913	2.06522	1.65217	0.182609	0.477612	2.49457	2.54348		minor	Colobopsis	leonardi	COCY
770	AB 02-100	1.73913	1.80435	1.52174	0.169565	0.464345	2.38043	2.28261		minor	Colobopsis	leonardi	COCY
771	AB 02-100	1.94565	2.06522	1.63043	0.182609	0.517413	2.51087	2.6087		minor	Colobopsis	leonardi	COCY
810	AB KB02-100	1.65217	1.78261	1.52174	0.156522	0.451078	2.34783	2.21739		minor	Colobopsis	leonardi	COCY
811	AB KB02-100	1.69565	1.80435	1.53261	0.163043	0.457711	2.34783	2.41304		minor	Colobopsis	leonardi	COCY
812	AB KB02-100	1.6413	1.71739	1.45652	0.156522	0.451078	2.28261	2.28261		minor	Colobopsis	leonardi	COCY
813	AB KB02-100	1.6087	1.76087	1.5	0.15	0.444444	2.34783	2.34783		minor	Colobopsis	leonardi	COCY
814	AB KB02-100	1.8913	2.02174	1.58696	0.163043	0.504146	2.34783	2.54348		minor	Colobopsis	leonardi	COCY
815	AB KB02-100	1.8913	2.06522	1.6087	0.18913	0.484245	2.44565	2.47826		minor	Colobopsis	leonardi	COCY
844	AB 1200 (203)	1.78261	1.86957	1.47826	0.169565	0.470978	2.21739	2.34783		minor	Colobopsis	leonardi	COCY
845	AB 1200 (203)	1.5	1.63043	1.3913	0.156522	0.41791	2.05435	2.08696		minor	Colobopsis	leonardi	COCY
925	AB-1 (69)	1.82609	1.95652	1.56522	0.176087	0.484245	2.41304	2.41304		minor	Colobopsis	leonardi	COCY
926	AB-1 (69)	1.5	1.58696	1.32609	0.15	0.404643	2.05435	2.02174		minor	Colobopsis	leonardi	COCY
927	AB-1 (69)	1.82609	1.95652	1.58696	0.176087	0.484245	2.41304	2.54348		minor	Colobopsis	leonardi	COCY
928	AB-1 (69)	2.20652	2.44565	1.65217	0.195652	0.563847	2.6087	3		minor	Colobopsis	leonardi	COCY
929	AB-1 (69)	2.21739	2.45652	1.76087	0.195652	0.563847	2.70652	3		minor	Colobopsis	leonardi	COCY
881	CH-1 (61)	1.78261	2	1.63043	0.195652	0.451078	2.36413	2.47826		minor	Colobopsis	cylindrica	COCY
882	CH-1 (61)	1.45652	1.63043	1.43478	0.156522	0.371476	2.11957	2.02174		minor	Colobopsis	cylindrica	COCY
883	CH-1 (61)	1.43478	1.56522	1.41304	0.163043	0.391376	2.08696	1.98913		minor	Colobopsis	cylindrica	COCY
884	CH-1 (61)	1.70652	1.8913	1.56522	0.195652	0.444444	2.28261	2.41304		minor	Colobopsis	cylindrica	COCY
930	CH-1 (79)	1.65217	1.84783	1.54348	0.18913	0.451078	2.21739	2.21739		minor	Colobopsis	cylindrica	COCY
931	CH-1 (79)	1.76087	1.93478	1.63043	0.195652	0.444444	2.28261	2.41304		minor	Colobopsis	cylindrica	COCY
932	CH-1 (79)	1.57609	1.68478	1.45652	0.176087	0.424544	2.15217	2.05435		minor	Colobopsis	cylindrica	COCY
933	CH-1 (79)	1.76087	1.8913	1.58696	0.195652	0.444444	2.34783	2.38043		minor	Colobopsis	cylindrica	COCY
934	CH-1 (79)	1.45652	1.58696	1.41304	0.163043	0.391376	2.07065	2.08696		minor	Colobopsis	cylindrica	COCY
935	CH-1 (79)	1.63043	1.84783	1.56522	0.169565	0.431177	2.28261	2.34783		minor	Colobopsis	cylindrica	COCY
936	CH-1 (79)	1.51087	1.66304	1.43478	0.163043	0.404643	2.11957	2.08696		minor	Colobopsis	cylindrica	COCY
937	CH-1 (79)	1.69565	1.84783	1.52174	0.176087	0.451078	2.28261	2.34783		minor	Colobopsis	cylindrica	COCY
T2	Theresienfeld	0.793478	0.945652	0.73913	0.11087	0.288557	0.847826	1.1875		minor	Colobopsis	truncata
T3	Perchtoldsd. Heide PH 19	0.826087	0.934783	0.695652	0.119565	0.291874	0.798913	1.125		minor	Colobopsis	truncata
T10	Lainzer TG	0.902174	1.02174	0.76087	0.119565	0.318408	0.913043	1.3125		minor	Colobopsis	truncata
T11	Zayawiesen 189	0.869565	1.02174	0.76087	0.123913	0.298507	0.880435	1.3125		minor	Colobopsis	truncata
95	Phou Pan Mt. 27.4.14	2.29891	2.93478	3.5	0.26087	0.590381	4.375	4.5		minor	Camponotus	singularis
96	Phou Pan Mt. 8.4.14	1.98913	2.6087	3.28125	0.23913	0.563847	4	4.25		minor	Camponotus	singularis
97	Phou Pan Mt. 29.4.14	2.67391	3.3913	3.75	0.304348	0.66335	4.875	5		minor	Camponotus	singularis
98	Phou Pan Mt. 29.4.14	2.73913	3.45652	3.5625	0.282609	0.669983	4.6875	4.9375		minor	Camponotus	singularis
1114	inquilinus, Brunei #29	1.52174	1.63043	1.45652	0.159204	0.497512	1.72826	2.28261		minor	Camponotus	inquilinus	interloper
1115	inquilinus, Brunei #29	1.45652	1.58696	1.41304	0.159204	0.490879	1.76087	2.15217		minor	Camponotus	inquilinus	interloper
1116	inquilinus, Brunei #29	1.43478	1.56522	1.42391	0.139303	0.477612	1.72826	2.18478		minor	Camponotus	inquilinus	interloper
1117	inquilinus, Brunei #29	1.31522	1.45652	1.45652	0.15257	0.464345	1.69565	2.02174		minor	Camponotus	inquilinus	interloper
1118	inquilinus, Brunei #29	1.3587	1.47826	1.5	0.139303	0.470978	1.45109	2.02174		minor	Camponotus	inquilinus	interloper
1119	inquilinus, Brunei #29	1.32609	1.3913	1.43478	0.145937	0.457711	1.67935	2.05435		minor	Camponotus	inquilinus	interloper
1120	inquilinus, Brunei #29	1.3587	1.45652	1.45652	0.145937	0.464345	1.69565	2.08696		minor	Camponotus	inquilinus	interloper
1121	inquilinus, Brunei #29	1.32609	1.41304	1.45652	0.145937	0.451078	1.66304	2.02174		minor	Camponotus	inquilinus	interloper
1122	inquilinus, Brunei #29 HT	1.30435	1.41304	1.45652	0.13267	0.451078	1.66304	2.02174		minor	Camponotus	inquilinus	interloper
1173	inquilinus, Brunei #27	1.34783	1.41304	1.45652	0.14262	0.464345	1.69565	2.02174		minor	Camponotus	inquilinus	interloper
1545	YG KBFSC (Vienna colony)	1.29348	1.23913	0.826087	0.104348	0.464345	1.76087	2.86957		male	Colobopsis	saundersi	COCY
1546	YG KBFSC (Vienna colony)	1.18478	1.21739	0.836957	0.0978261	0.457711	1.79348	2.54348		male	Colobopsis	saundersi	COCY
1547	YG KBFSC (Vienna colony)	1.28261	1.21739	0.847826	0.117391	0.444444	1.8587	2.67391		male	Colobopsis	saundersi	COCY
1355	YG male KBFSC (Vienna colony)	1.23913	1.17391	0.826087	0.104348	0.431177	1.76087	2.6087		male	Colobopsis	saundersi	COCY
1359	YG male KBFSC (Vienna colony)	1.26087	1.19565	0.836957	0.11087	0.437811	1.82609	2.54348		male	Colobopsis	saundersi	COCY
1360	YG male KBFSC (Vienna colony)	1.26087	1.1413	0.804348	0.117391	0.437811	1.71196	2.38043		male	Colobopsis	saundersi	COCY
1363	YG (19)	1.71739	2.31522	1.15217	0.18913	0.524046	1.5	2.41304		major	Colobopsis	saundersi	COCY
1555	YG KBFSC (Vienna colony)	1.82609	2.57609	1.21739	0.195652	0.563847	1.64674	2.73913		major	Colobopsis	saundersi	COCY
1556	YG KBFSC (Vienna colony)	1.84783	2.44565	1.17391	0.202174	0.537313	1.66304	2.67391		major	Colobopsis	saundersi	COCY
638	YG KB02-108	1.71739	2.28261	1.15217	0.176087	0.497512	1.63043	2.21739		major	Colobopsis	saundersi	COCY
639	YG KB02-108	1.73913	2.25	1.17391	0.169565	0.497512	1.63043	2.34783		major	Colobopsis	saundersi	COCY
1021	cf. YG 39 (351)	1.78261	2.34783	1.22826	0.195652	0.53068	1.64674	2.6087		major	Colobopsis	saundersi	COCY
1022	cf. YG 39 (351)	1.86957	2.47826	1.26087	0.202174	0.537313	1.69565	2.6413		major	Colobopsis	saundersi	COCY
1023	YG 373	1.8913	2.51087	1.21739	0.18913	0.524046	1.66304	2.6087		major	Colobopsis	saundersi	COCY
829	nrLCY KB02-72 (RHYG)	1.56522	2.08696	1.13043	0.169565	0.484245	1.46739	2.28261		major	Colobopsis	saundersi	COCY
830	nrLCY KB02-72 (RHYG)	1.6087	2.18478	1.08696	0.169565	0.464345	1.43478	2.34783		major	Colobopsis	saundersi	COCY
1732	AR KBFSC (Vienna colony)	2.15217	2.77174	1.38043	0.215217	0.597015	1.95652	3.06522		major	Colobopsis	saundersi	COCY
1384	nrSA 27 (262)	2	2.71739	1.33696	0.208696	0.597015	1.8913	3.09783		major	Colobopsis	saundersi	COCY
1097	nrSA 27 (359)	1.93478	2.67391	1.28261	0.182609	0.557214	1.79348	2.93478		major	Colobopsis	saundersi	COCY
1098	nrSA 27 (359)	1.91304	2.57609	1.30435	0.195652	0.53068	1.72826	2.80435		major	Colobopsis	saundersi	COCY
1099	nrSA 27 (359)	1.95652	2.67391	1.34783	0.182609	0.543947	1.79348	2.90217		major	Colobopsis	saundersi	COCY
1100	nrSA 27 (359)	2.06522	2.77174	1.36957	0.215217	0.603648	1.90761	3.26087		major	Colobopsis	saundersi	COCY
1101	nrSA 27 (359)	2	2.73913	1.38043	0.202174	0.563847	1.875	3.03261		major	Colobopsis	saundersi	COCY
1751	BBQ Vienna 2017 maj	2.31522	2.93478	1.65217	0.195652	0.610282	2.6087	3.26087		major	Colobopsis	leonardi	COCY
1729	BBQ Vienna 2017	2.25	2.80435	1.6087	0.208696	0.603648	2.51087	3.13043		major	Colobopsis	leonardi	COCY
1723	BBQ Vienna 2017	2.34783	2.96739	1.65217	0.215217	0.597015	2.47826	3.19565		major	Colobopsis	leonardi	COCY
1528	LE VCW	2.1087	2.51087	1.63043	0.195652	0.590381	2.57609	2.67391		major	Colobopsis	leonardi	COCY
1529	LE VCW	2.13043	2.57609	1.65217	0.202174	0.603648	2.6413	2.93478		major	Colobopsis	leonardi	COCY
599	AB KB02-100	2.51087	3.16304	1.82609	0.228261	0.689884	2.86957	3.3913		major	Colobopsis	leonardi	COCY
885	CH-1 (61)	2.28261	2.93478	1.8913	0.26087	0.55058	2.70652	3.19565		major	Colobopsis	cylindrica	COCY
T1	Theresienfeld	1.06522	1.28261	0.673913	0.136957	0.344942	0.75	1.40625		major	Colobopsis	truncata
T9	Donauauen	1.04348	1.21739	0.717391	0.136957	0.344942	0.782609	1.375		major	Colobopsis	truncata
A1	Prater A	1.02174	1.21739	0.695652	0.136957	0.351575	0.815217	1.4375		major	Colobopsis	truncata
B1	Prater B	1.03261	1.21739	0.73913	0.136957	0.344942	0.831522	1.4375		major	Colobopsis	truncata
30	N Laos, Lg. Nam Tha 32	4.69565	5.08696	3.3125	0.347826	0.819237	4.625	5.1875		major	Camponotus	singularis
31	N Laos, Lg. Nam Tha 25	4.95652	5.02174	3.375	0.336957	0.779436	4.71875	5.3125		major	Camponotus	singularis
41	Carin Cheba	4.66304	5.08696	3.5625	0.326087	0.79602	4.875	5.8125		major	Camponotus	singularis
90	Phou Pan Mt. 8.4.14	5.28261	5.54348	3.625	0.369565	0.829187	5.125	5.4375		major	Camponotus	singularis
12	Java	4.53261	4.98913	3.52174	0.347826	0.762852	4.95652	5.86957		major	Camponotus	singularis
1111	inquilinus, Brunei #29	1.91304	2.1087	1.28261	0.192371	0.563847	1.61413	2.34783		major	Camponotus	inquilinus	interloper
1112	inquilinus, Brunei #29	1.82609	2.04348	1.23913	0.139303	0.537313	1.56522	2.41304		major	Camponotus	inquilinus	interloper
1113	inquilinus, Brunei #29	1.8587	2.06522	1.21739	0.165837	0.517413	1.59783	2.34783		major	Camponotus	inquilinus	interloper
1134	LCY 23 (367) Q clarifemur	1.80435	2.38043	1.52174	0.208696	0.66335	2.51087	4.5	0.199005	gyne	Colobopsis	saundersi	COCY
1136	LCY 23 (367) Q clarifemur	1.80435	2.34783	1.45652	0.202174	0.636816	2.41304	4.30435	0.185738	gyne	Colobopsis	saundersi	COCY
1361	LCY 23 (367) Q clarifemur	1.76087	2.34783	1.45652	0.208696	0.643449	2.38043	4.17391	0.185738	gyne	Colobopsis	saundersi	COCY
1362	LCY 23 (367) Q clarifemur	1.80435	2.41304	1.48913	0.202174	0.650083	2.46196	4.27174	0.172471	gyne	Colobopsis	saundersi	COCY
1731	AR KBFSC (Vienna colony)	1.98913	2.57609	1.69565	0.208696	0.706468	2.6413	5.02174	0.199005	gyne	Colobopsis	saundersi	COCY
1680	YG KBFSC (Vienna colony)	1.80435	2.44565	1.44565	0.215217	0.630182	2.29891	4.56522	0.139303	gyne	Colobopsis	saundersi	COCY
1681	YG KBFSC (Vienna colony)	1.75	2.28261	1.32609	0.202174	0.630182	2.25	4.30435	0.159204	gyne	Colobopsis	saundersi	COCY
1682	YG KBFSC (Vienna colony)	1.76087	2.41304	1.41304	0.208696	0.650083	2.25	4.43478	0.15257	gyne	Colobopsis	saundersi	COCY
1683	YG KBFSC (Vienna colony)	1.76087	2.41304	1.3913	0.208696	0.656716	2.25	4.56522	0.159204	gyne	Colobopsis	saundersi	COCY
1548	YG KBFSC (Vienna colony)	1.76087	2.34783	1.41304	0.208696	0.630182	2.21739	4.30435	0.139303	gyne	Colobopsis	saundersi	COCY
1549	YG KBFSC (Vienna colony)	1.73913	2.38043	1.36957	0.208696	0.636816	2.25	4.1087	0.15257	gyne	Colobopsis	saundersi	COCY
1550	YG KBFSC (Vienna colony)	1.78261	2.34783	1.3913	0.215217	0.623549	2.34783	4.17391	0.13267	gyne	Colobopsis	saundersi	COCY
1551	YG KBFSC (Vienna colony)	1.82609	2.44565	1.36957	0.215217	0.636816	2.28261	4.5	0.15257	gyne	Colobopsis	saundersi	COCY
1552	YG KBFSC (Vienna colony)	1.78261	2.34783	1.3913	0.217391	0.643449	2.25	4.30435	0.15257	gyne	Colobopsis	saundersi	COCY
1553	YG KBFSC (Vienna colony)	1.76087	2.31522	1.41304	0.208696	0.630182	2.31522	4.17391	0.13267	gyne	Colobopsis	saundersi	COCY
1554	YG KBFSC (Vienna colony)	1.76087	2.41304	1.38043	0.208696	0.636816	2.25	4.43478	0.159204	gyne	Colobopsis	saundersi	COCY
1352	YG KBFSC (Vienna colony)	1.78261	2.44565	1.3913	0.215217	0.636816	2.25	4.56522	0.159204	gyne	Colobopsis	saundersi	COCY
1353	YG KBFSC (Vienna colony)	1.78261	2.38043	1.41304	0.206522	0.630182	2.25	4.63043	0.145937	gyne	Colobopsis	saundersi	COCY
1354	YG KBFSC (Vienna colony)	1.78261	2.41304	1.41304	0.208696	0.643449	2.25	4.33696	0.159204	gyne	Colobopsis	saundersi	COCY
1356	YG KBFSC (17)	1.76087	2.38043	1.3913	0.208696	0.630182	2.25	4.43478	0.13267	gyne	Colobopsis	saundersi	COCY
1357	YG KBFSC (17)	1.77174	2.34783	1.3913	0.215217	0.630182	2.31522	4.17391	0.129353	gyne	Colobopsis	saundersi	COCY
946	nrSA colony 1 (149)	1.90217	2.41304	1.54348	0.215217	0.650083	2.51087	4.36957	0.179104	gyne	Colobopsis	saundersi	COCY
947	nrSA colony 1 (149)	1.91304	2.47826	1.58696	0.228261	0.636816	2.57609	4.43478	0.165837	gyne	Colobopsis	saundersi	COCY
948	nrSA colony 1 (148)	1.93478	2.51087	1.57609	0.221739	0.676617	2.6087	4.95652	0.192371	gyne	Colobopsis	saundersi	COCY
949	nrSA colony 1 (148)	1.8913	2.44565	1.54348	0.208696	0.636816	2.57609	4.76087	0.199005	gyne	Colobopsis	saundersi	COCY
1139	nrSA 27 (361) Q	2	2.57609	1.6087	0.221739	0.68325	2.6087	4.8587	0.179104	gyne	Colobopsis	saundersi	COCY
1358	nrSA 27 (361)	1.97826	2.6087	1.53261	0.228261	0.669983	2.51087	4.82609	0.179104	gyne	Colobopsis	saundersi	COCY
1376	nrSA 27 (275)	1.93478	2.51087	1.58696	0.221739	0.693201	2.55978	4.8913	0.185738	gyne	Colobopsis	saundersi	COCY
1377	nrSA 27 (275)	2	2.6087	1.6087	0.228261	0.693201	2.57609	5.02174	0.179104	gyne	Colobopsis	saundersi	COCY
1378	nrSA 27 (275)	2	2.63043	1.6087	0.221739	0.693201	2.6413	5.08696	0.192371	gyne	Colobopsis	saundersi	COCY
1379	nrSA 27 (275)	1.96739	2.57609	1.58696	0.228261	0.699834	2.6413	5.02174	0.192371	gyne	Colobopsis	saundersi	COCY
1380	nrSA 27 (275)	1.95652	2.6087	1.59783	0.228261	0.669983	2.54348	5.08696	0.185738	gyne	Colobopsis	saundersi	COCY
1381	nrSA 27 (276)	2	2.6413	1.59783	0.228261	0.693201	2.57609	5.08696	0.179104	gyne	Colobopsis	saundersi	COCY
1382	nrSA 27 (276)	1.95652	2.61957	1.6087	0.228261	0.68325	2.57609	5.08696	0.179104	gyne	Colobopsis	saundersi	COCY
1383	nrSA 27 (276)	1.97826	2.58696	1.58696	0.228261	0.676617	2.57609	4.98913	0.179104	gyne	Colobopsis	saundersi	COCY
1750	BBQ Vienna 2017 Q	1.95652	2.67391	1.54348	0.234783	0.676617	2.47826	4.56522	0.185738	gyne	Colobopsis	leonardi	COCY
1724	BBQ Vienna 2017	2.01087	2.6413	1.56522	0.234783	0.699834	2.51087	4.56522	0.185738	gyne	Colobopsis	leonardi	COCY
1725	BBQ Vienna 2017	2.06522	2.80435	1.54348	0.234783	0.716418	2.51087	4.63043	0.205638	gyne	Colobopsis	leonardi	COCY
1726	BBQ Vienna 2017	2	2.70652	1.54348	0.228261	0.686567	2.44565	4.69565	0.185738	gyne	Colobopsis	leonardi	COCY
1727	BBQ Vienna 2017	2	2.6413	1.52174	0.228261	0.686567	2.51087	4.63043	0.179104	gyne	Colobopsis	leonardi	COCY
1728	BBQ Vienna 2017	2	2.70652	1.57609	0.23913	0.693201	2.51087	4.76087	0.192371	gyne	Colobopsis	leonardi	COCY
1730	BBQ Vienna 2017	2	2.77174	1.54348	0.234783	0.693201	2.44565	4.82609	0.165837	gyne	Colobopsis	leonardi	COCY
1375	BBQ MIT1, 5857 Q	2.04348	2.77174	1.6087	0.228261	0.676617	2.54348	4.82609	0.159204	gyne	Colobopsis	leonardi	COCY
841	Sumatra, Pangherang-Pisang, doriae	2	3.45652	1.95652	0.391304	0.729685	2.86957	5.41304	0.126036	gyne	Colobopsis	cylindrica	COCY
1277	Sumatra Q	2	3.52174	2.06522	0.354348	0.693201	3.03261	5.41304	0.145937	gyne	Colobopsis	cylindrica	COCY
T4	Steinhofgründe	1.04348	1.17391	0.804348	0.136957	0.404643	0.945652	1.9375	0.0597015	gyne	Colobopsis	truncata
T5	Lainzer TG	1.03261	1.21739	0.76087	0.141304	0.411277	0.880435	1.9375	0.0729685	gyne	Colobopsis	truncata
T7	Laxenburg	1.06522	1.23913	0.847826	0.15	0.431177	0.945652	2	0.0895522	gyne	Colobopsis	truncata
T8	Laxenburg	1.06522	1.25	0.804348	0.15	0.431177	0.945652	2	0.0729685	gyne	Colobopsis	truncata
2	Java '94	4.17391	4.43478	3.6875	0.358696	0.78607	4.9375	6.3125	0.165837	gyne	Camponotus	singularis
3	Java '94	4.36957	4.56522	3.625	0.369565	0.802653	4.875	6.25	0.199005	gyne	Camponotus	singularis
4	Java '94	4.20652	4.30435	3.625	0.347826	0.802653	4.875	6.5	0.212272	gyne	Camponotus	singularis
5	Java '94	4.30435	4.43478	3.625	0.380435	0.819237	4.875	6.40625	0.179104	gyne	Camponotus	singularis
1110	inquilinus, Brunei #29	1.71739	1.80435	1.28261	0.165837	0.623549	1.71196	3.19565	0.112769	gyne	Camponotus	inquilinus	interloper
1761	KBFSC 2017, cf YG 2a	1.68478	2.04348	1.46739	0.176087	0.484245	2.28261	2.41304		IC	Colobopsis	saundersi	COCY
1385	nrSA 27 (264) Intermorph	1.82609	2.21739	1.54348	0.176087	0.497512	2.33152	2.6087		IC	Colobopsis	saundersi	COCY
1137	nrSA 27 (360) MQ	2.21739	2.80435	1.97826	0.202174	0.686567	3.22826	3.68478	0.0597015	MIC	Colobopsis	saundersi	COCY
1138	nrSA 27 (360) MQ	2.21739	2.83696	1.97826	0.228261	0.66335	3.16304	3.45652	0.0331675	MIC	Colobopsis	saundersi	COCY
1753	BBQ Vienna 2017 MG	2.13043	2.44565	1.86957	0.202174	0.603648	2.93478	3		MIC	Colobopsis	leonardi	COCY

## Sheet: errors
			C. explodens gyne #1680, repeat measurements, n = 10
			HW gyn		HL gyn		SL gyn		SW gyn		EL gyn		FeL gyn		WL gyn		OcW gyn
		Mean (mm)	1.80435		2.43261		1.44348		0.200816		0.626866		2.20312		4.45		0.139967
		SD	0		0.0133617		0.00857403		0.00197162		0.00442233		0.0104167		0.0446825		0.00139846
		SE	0		0.00422533		0.00271135		0.00062348		0.00139846		0.00329404		0.0141299		0.000442233
		relative error	0		0.0248508		0.0268737		0.0444197		0.0319176		0.0213916		0.0454287		0.0452042
		relative SE	0		0.00785852		0.00849821		0.0140468		0.0100932		0.0067646		0.0143658		0.0142948
		C. explodens minor #1557, repeat measurements, n = 10
			HW min		HL min		SL min		SW min		EL min		FeL min		WL min
		Mean (mm)	1.4413		1.60217		1.29565		0.133878		0.391376		1.88125		1.8875
		SD	0.00916602		0.00916602		0.00857403		0.00105387		0.00221117		0.00806872		0.0161374
		SE	0.00289855		0.00289855		0.00271135		0.000333264		0.000699232		0.00255155		0.0051031
		relative error	0.0287725		0.0258836		0.0299398		0.035615		0.0255611		0.0194049		0.0386812
		relative SE	0.00909867		0.0081851		0.0094678		0.0112625		0.00808313		0.00613636		0.0122321
